# Supplementary material for: A bis-calix[4]arene-supported [CuII16] cage
Source: Royal Society of Chemistry journal article supplement (doi:10.1039/d3dt01448g), 2023-01-01
Supplement: d3dt01448g1.pdf [file d3dt01448g1.pdf]

S1

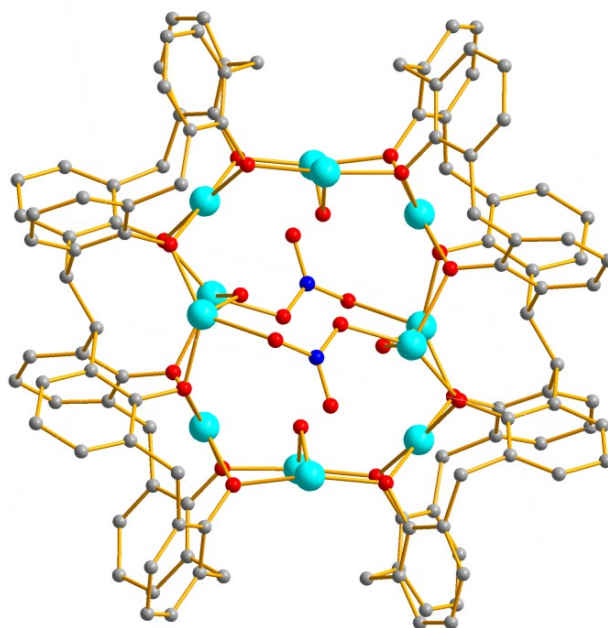

**Figure S1.** The  $[Cu_{12}]$  tetrapped square prism in **4**, highlighting the coordination of the  $OH^-$ ,  $L^8$  and  $NO_3^-$  ions.

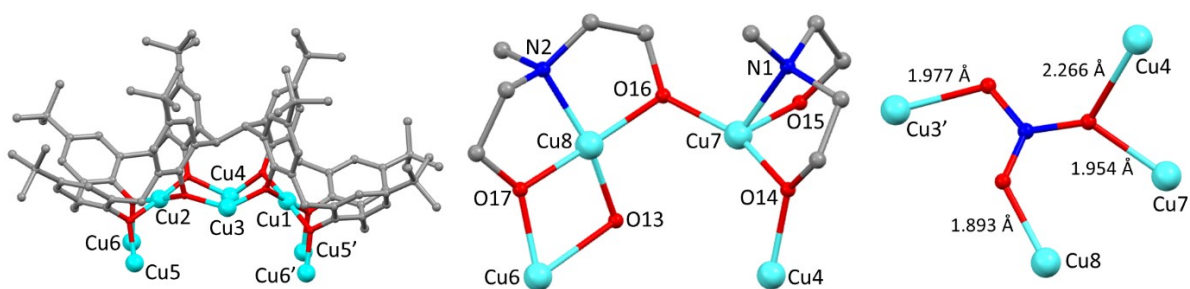

**Figure S2.** The bonding modes of L (left), Me-dea (middle) and  $NO_3^-$  (right) in **4**. The latter is  $\mu_3$ -bridging but with two further contacts to two Cu ions (Cu4, Cu6).

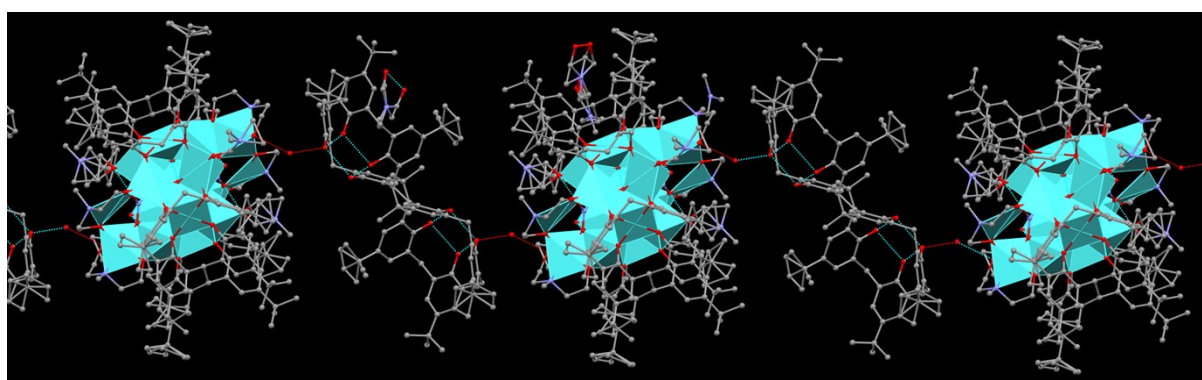

**Figure S3.** The H-bonded  $-Cu_{16}-H_2O-H_6L-$  chains in the crystal structure of **4**. The Cu ions are in polyhedral format and the remaining atoms ball and stick. The H-bonds are shown as dashed lines. H atoms omitted for clarity.

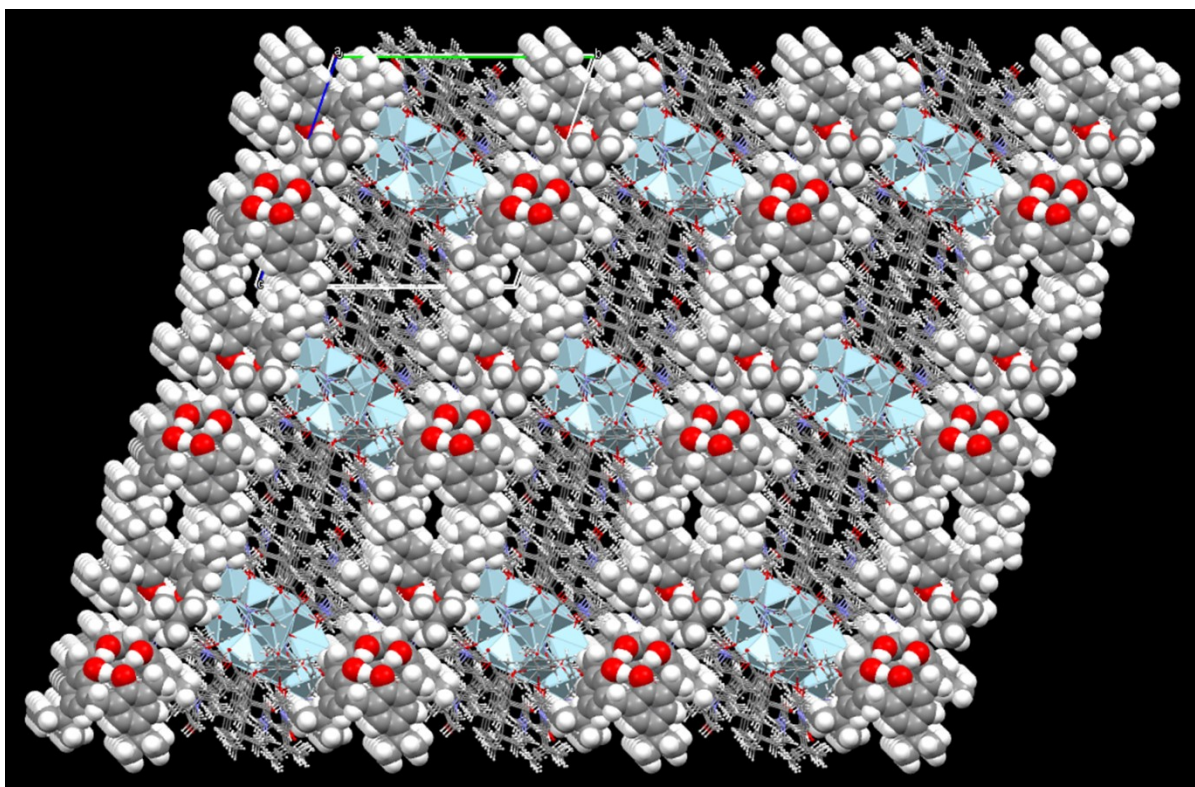

**Figure S4.** The extended structure in **4** viewed down the  $a$ -axis highlighting the connection between the cluster in polyhedral format, the  $H_6L^{2-}$  counter anions (space fill) and the solvent molecules of crystallisation.

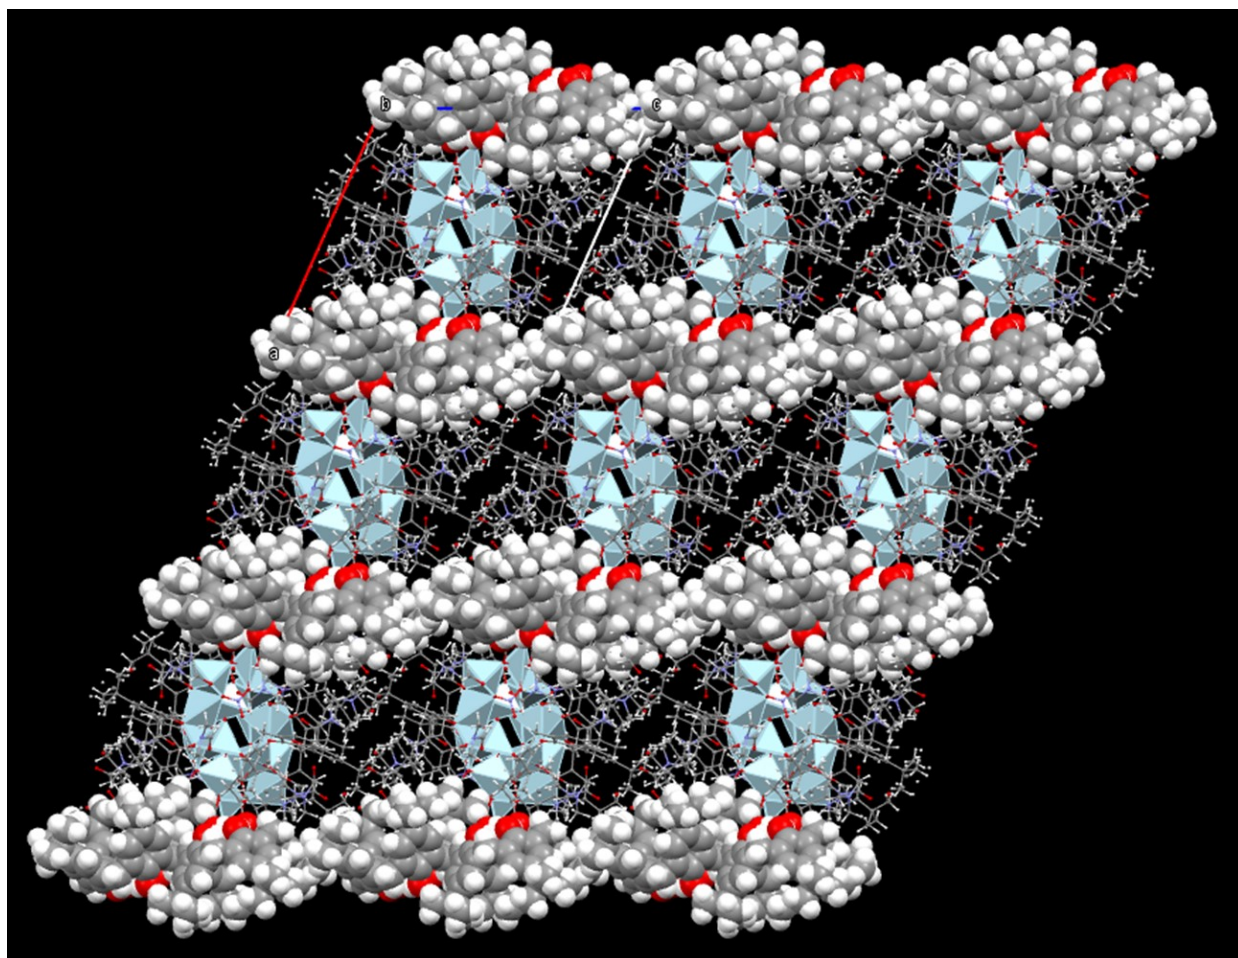

**Figure S5.** The extended structure in **4** viewed down the *b*-axis highlighting the connection between the cluster in polyhedral format, the H<sub>6</sub>L<sup>2-</sup> counter anions (space fill) and the solvent molecules of crystallisation.

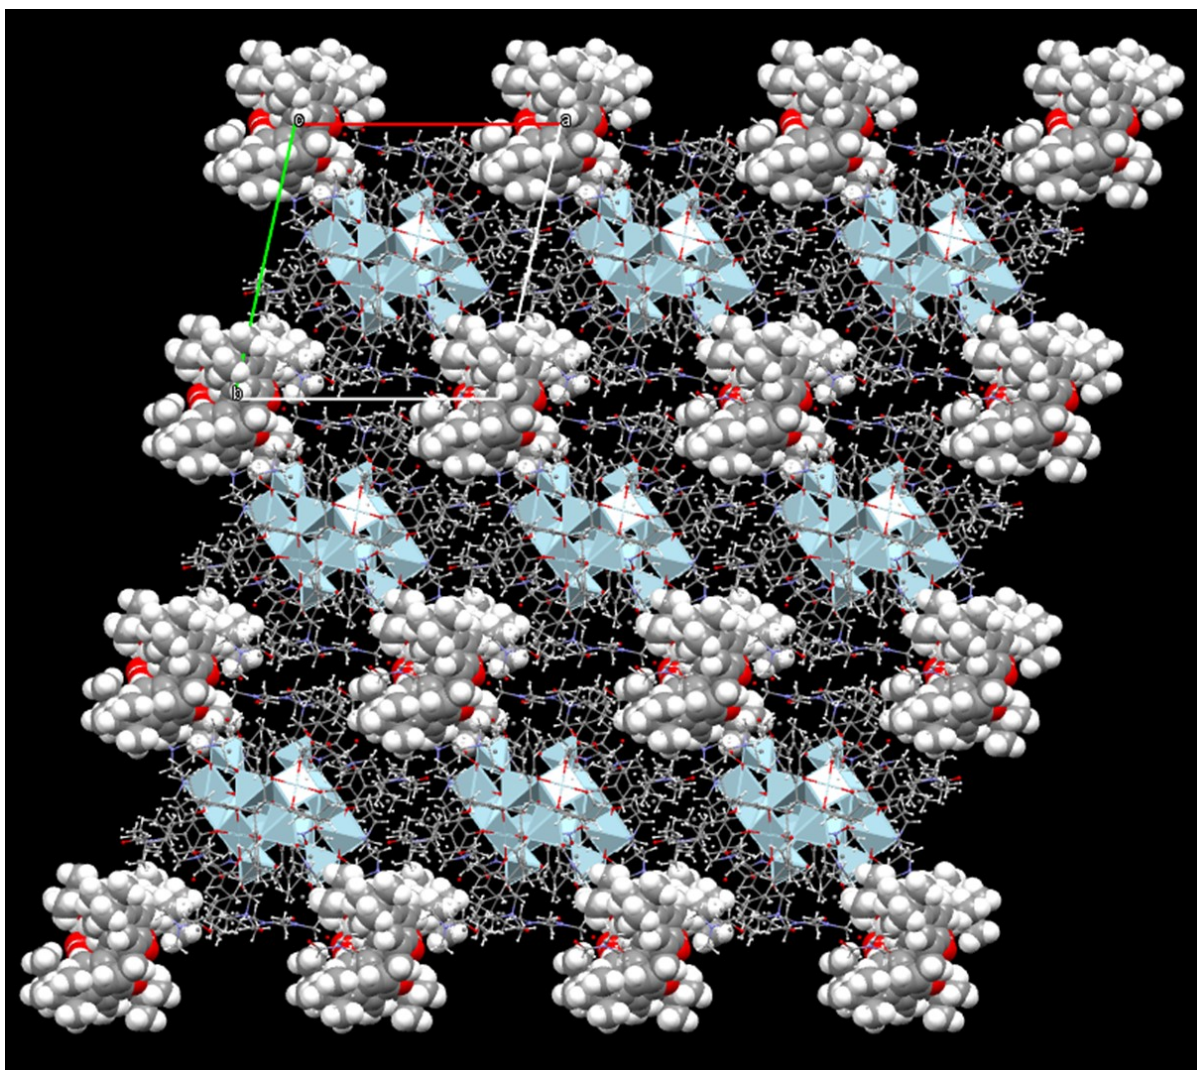

**Figure S6.** The extended structure in **4** viewed down the *c*-axis highlighting the connection between the cluster in polyhedral format, the  $H_6L^{2-}$  counter anions (space fill) and the solvent molecules of crystallisation.

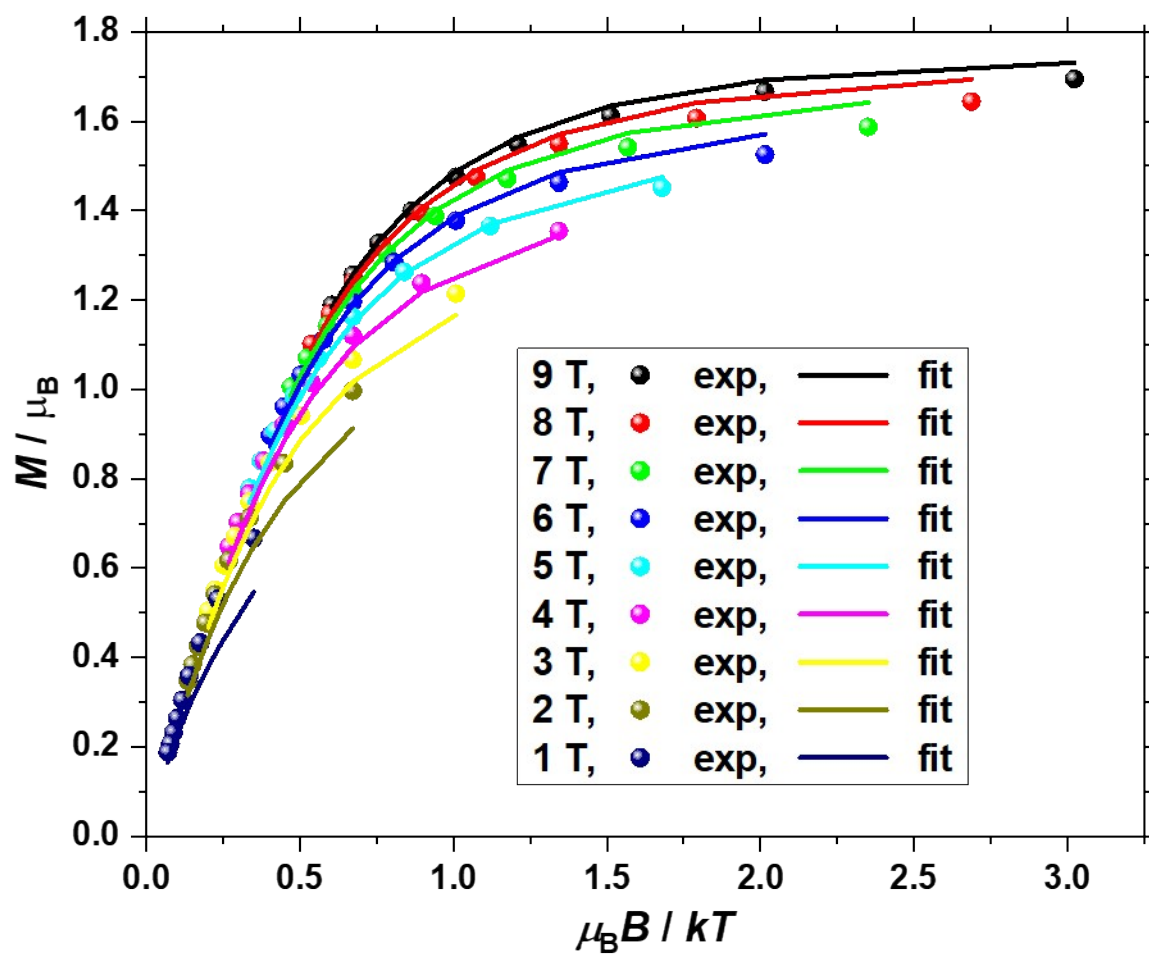

**Figure S7.** VTVB data of **4** in the temperature range 2 to 10 K and field range 1 to 9 T. The solid lines are a fit of the data assuming an isolated  $S = 1$  state, affording  $D = -8.5 \text{ cm}^{-1}$  with  $g$  fixed to  $g = 2.0$  [

$$\hat{H} = \sum_i D_i (\hat{S}_z^2 - S(S+1)/3) \quad ].$$

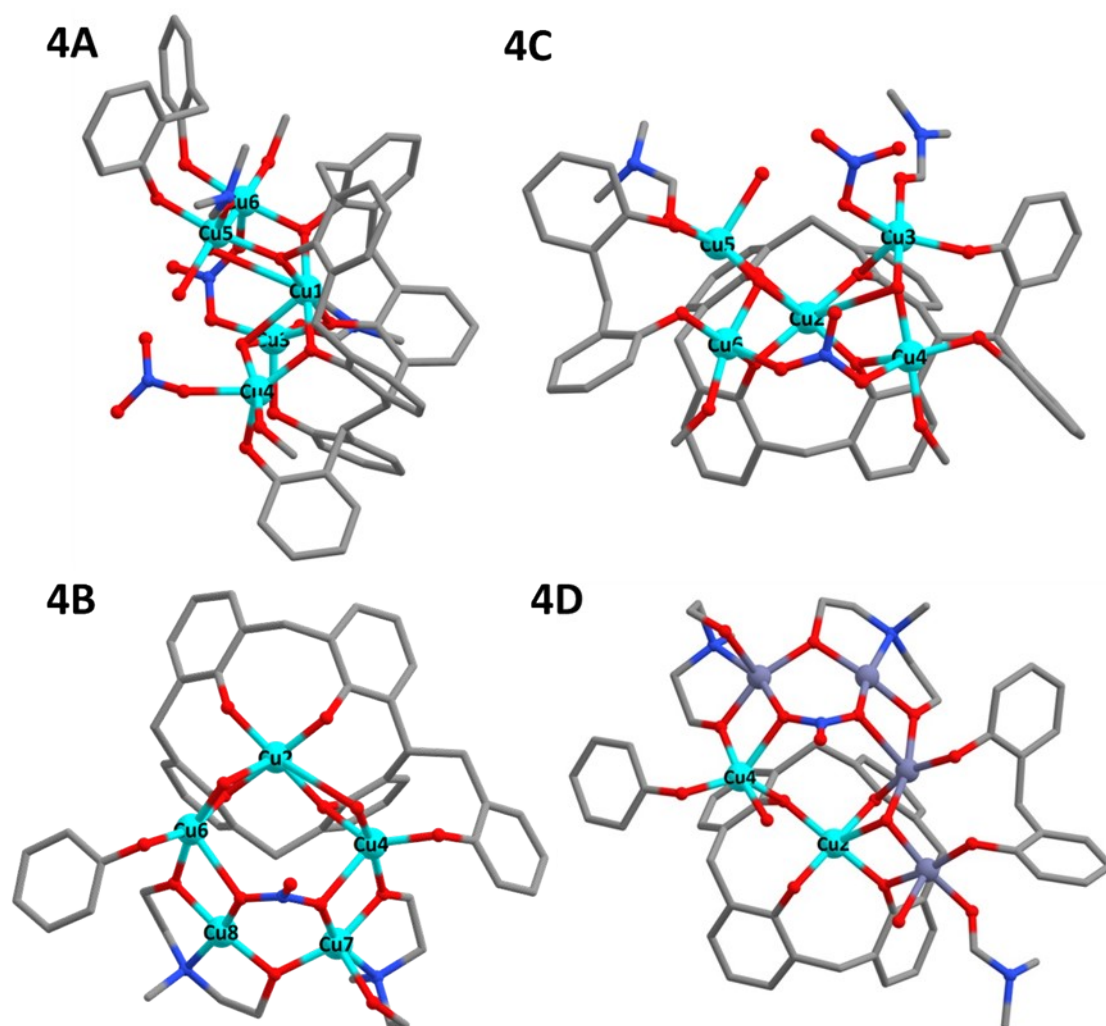

**Figure S8.** The three pentametallic models **4A-C** and the bimetallic model **4D** employed to calculate the magnetic exchange interactions in **4**.

| $J$                                     | $\text{cm}^{-1}$ | Avg. Cu-O-Cu Angle ( $^\circ$ ) | Avg. Cu-O Distance ( $\text{\AA}$ ) | Cu-O-Cu-O Dihedral Angle ( $^\circ$ ) | Cu...Cu Distance ( $\text{\AA}$ ) | Bridging group(s)                                                      |
|-----------------------------------------|------------------|---------------------------------|-------------------------------------|---------------------------------------|-----------------------------------|------------------------------------------------------------------------|
| $J_{\text{Cu1-Cu3}}$                    | +6.9             | 95.9                            | 2.108                               | 23.6                                  | 3.118                             | $\mu\text{-OH}$ , $\mu\text{-OPh}$                                     |
| $J_{\text{Cu1-Cu4}}$                    | -16.6            | 101.6                           | 2.091                               | 10.3                                  | 3.223                             | $\mu_3\text{-OH}$ , $\mu\text{-OPh}$                                   |
| $J_{\text{Cu1-Cu5}}/J_{\text{Cu1-Cu6}}$ | -25.3            | 120.0/120.6                     | 1.962/1.971                         | --                                    | 3.400/3.424                       | $\mu\text{-OPh}$                                                       |
| $J_{\text{Cu2-Cu3}}$                    | -17.7            | 119.0                           | 2.038                               | --                                    | 3.514                             | $\mu\text{-OPh}$                                                       |
| $J_{\text{Cu2-Cu4}}^*$                  | -55.7            | 131.7                           | 2.010                               | --                                    | 3.668                             | $\mu\text{-OPh}$                                                       |
| $J_{\text{Cu2-Cu5}}$                    | -22.0            | 102.8                           | 2.087                               | 1.1                                   | 3.251                             | $\mu\text{-OH}$ , $\mu\text{-OPh}$                                     |
| $J_{\text{Cu2-Cu6}}$                    | -7.5             | 100.2                           | 2.081                               | 16.4                                  | 3.183                             | $\mu\text{-OH}$ , $\mu\text{-OPh}$                                     |
| $J_{\text{Cu3-Cu4}}$                    | -30.8            | 125.7                           | 1.957                               | --                                    | 3.482                             | $\mu\text{-OH}$                                                        |
| $J_{\text{Cu4-Cu7}}$                    | -11.6            | 103.2                           | 2.014                               | 5.5                                   | 3.146                             | $\mu\text{-O}(\text{NO}_2)$ , $\mu\text{-OR}$                          |
| $J_{\text{Cu5-Cu6}}$                    | -3.9             | 107.2                           | 1.947                               | --                                    | 3.135                             | $\mu\text{-OH}$                                                        |
| $J_{\text{Cu6-Cu8}}$                    | +2.6             | 98.1                            | 2.049                               | 16.9                                  | 3.086                             | $\mu\text{-O}(\text{NO}_2)$ , $\mu\text{-OR}$                          |
| $J_{\text{Cu7-Cu8}}$                    | -9.9             | 114.6                           | 1.930                               | --                                    | 3.249                             | $\eta^1$ , $\eta^1$ , $\eta^2$ , $\mu_4\text{-NO}_3$ , $\mu\text{-OR}$ |

\*Estimated using bimetallic model **4D**.

**Table S2.** DFT estimated magnetic exchange interactions alongside the pertinent structural parameters for

complex **4**. Calculations are based on the 
$$\hat{H} = -2 \sum_{i,j > i} J_{ij} \hat{S}_i \cdot \hat{S}_j$$
 formalism.

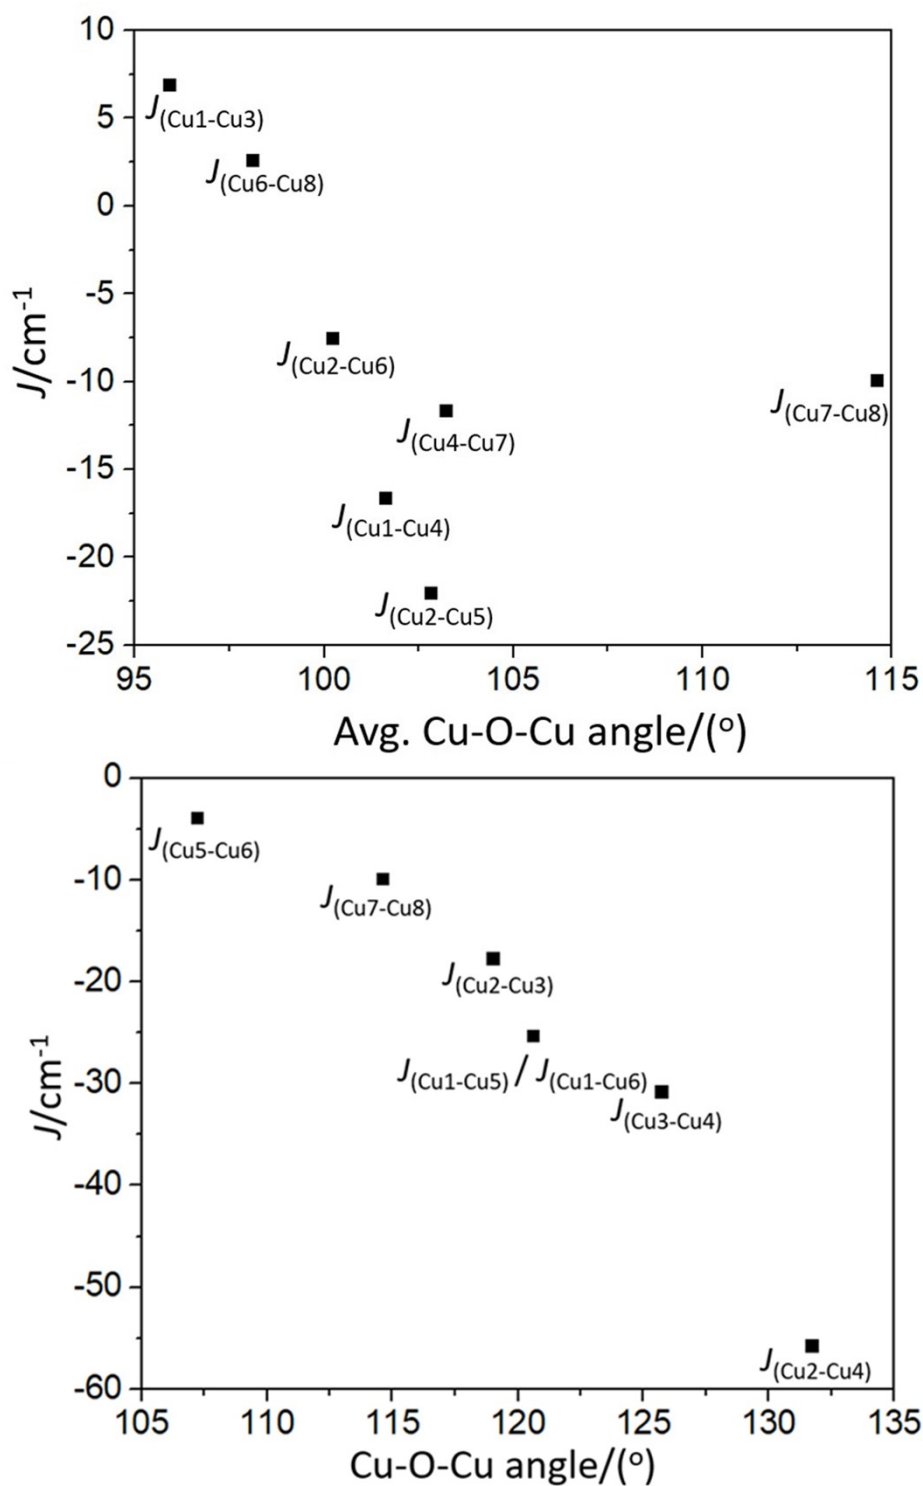

**Figure S9.** DFT estimated magnetic exchange interactions plotted versus the Cu-O-Cu angle ( $^{\circ}$ ) for pairs of nearest neighbour Cu ions in **4**. The upper graph shows Cu ions linked by two different bridging ligands, the lower graph shows Cu ions linked by one bridging ligand. The magneto-structural correlation reveals that the sign and magnitude of  $J$  strongly depends on the Cu-O-Cu angle, with larger Cu-O-Cu angles leading to strong antiferromagnetic exchange whose magnitude decreases with decreasing angle. The small deviation observed for  $J_{(\text{Cu4-Cu7})}$  is due to a counter-complementarity effect due to the presence of  $\mu_2\text{-OR/O}(\text{NO}_2)$  groups. The deviation for  $J_{(\text{Cu7-Cu8})}$  is due to the near-negligible contribution to the exchange through the nitrate anion. This pathway therefore resembles a one ligand bridge and thus we include it in both plots. See the main text for details.



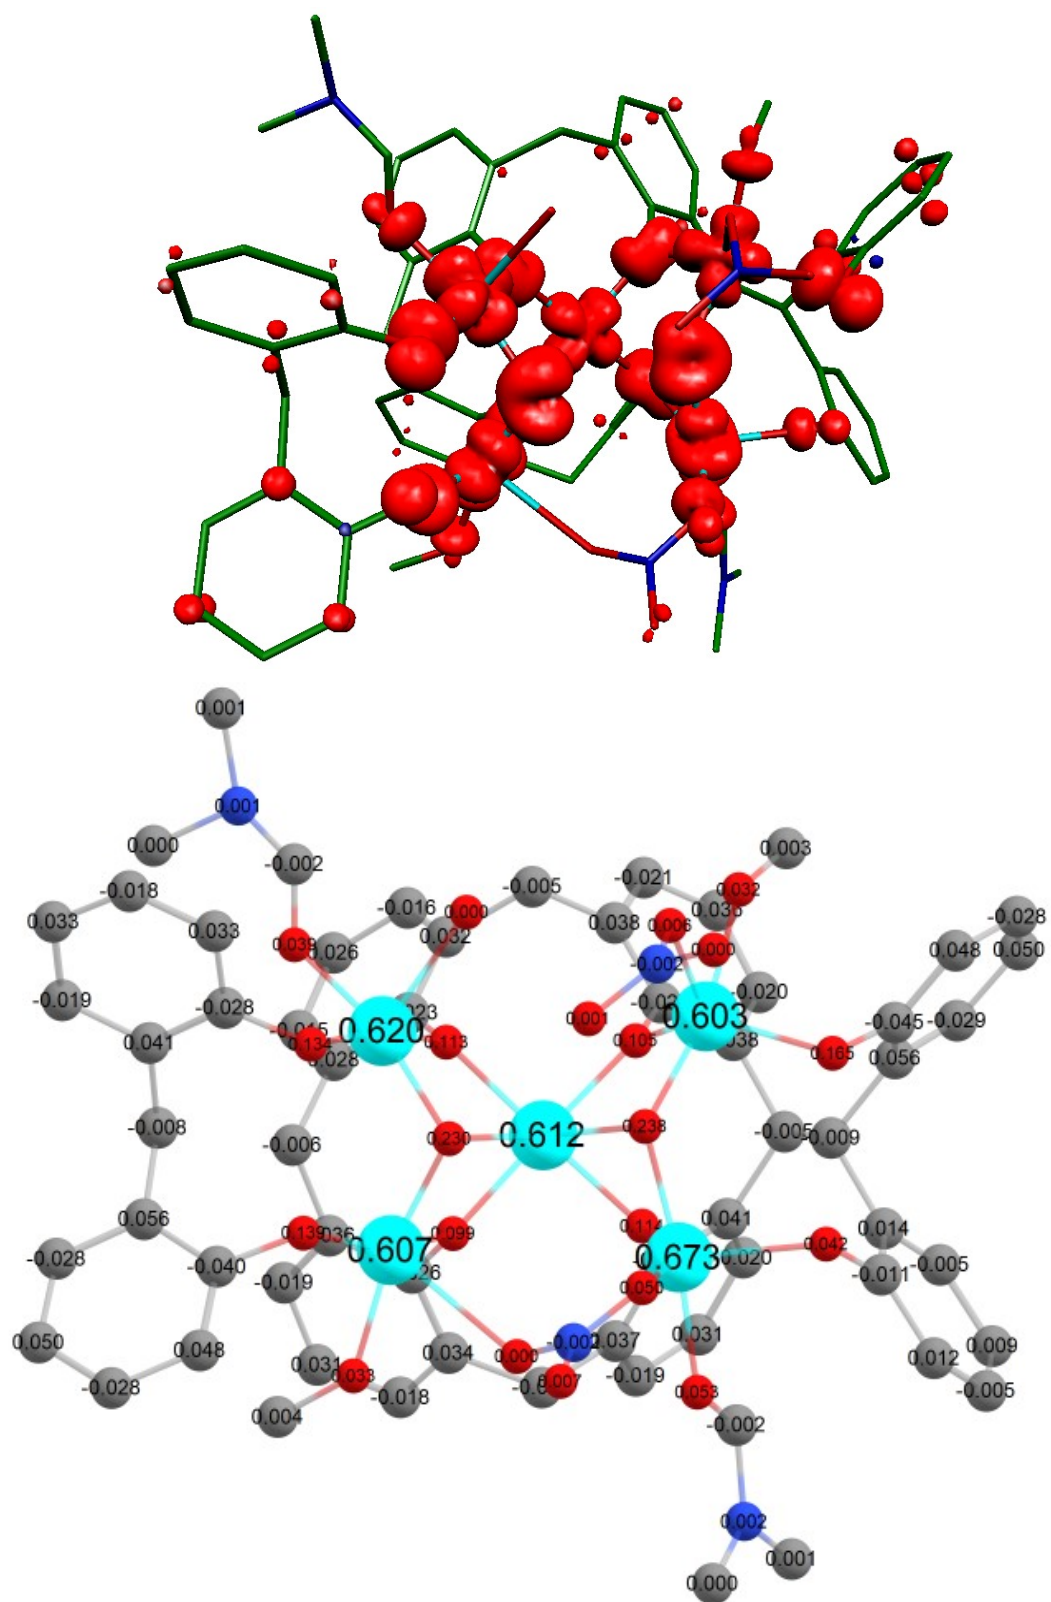

**Figure S10.** DFT estimated spin density plot (top) and values (bottom) for model **4A** with the isodensity surface value  $0.003 \text{ e bohr}^{-3}$ .





**Figure S12.** DFT estimated spin density plot (top) and values (bottom) for model **4C** with the isodensity surface value  $0.003 \text{ e bohr}^{-3}$ .

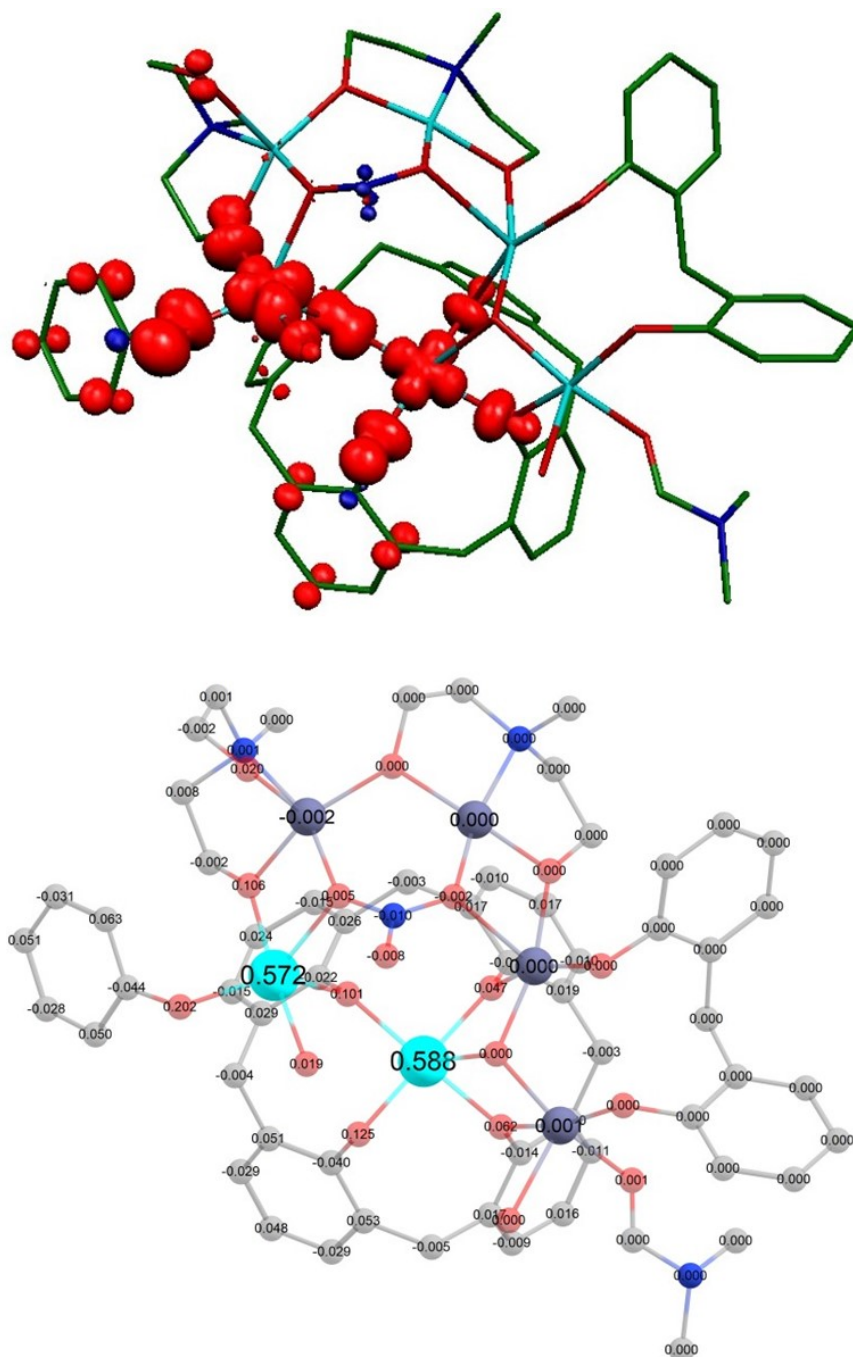

**Figure S13.** DFT estimated spin density plot (top) and values (bottom) for model **4D** with the isodensity surface value  $0.003 \text{ e bohr}^{-3}$ .

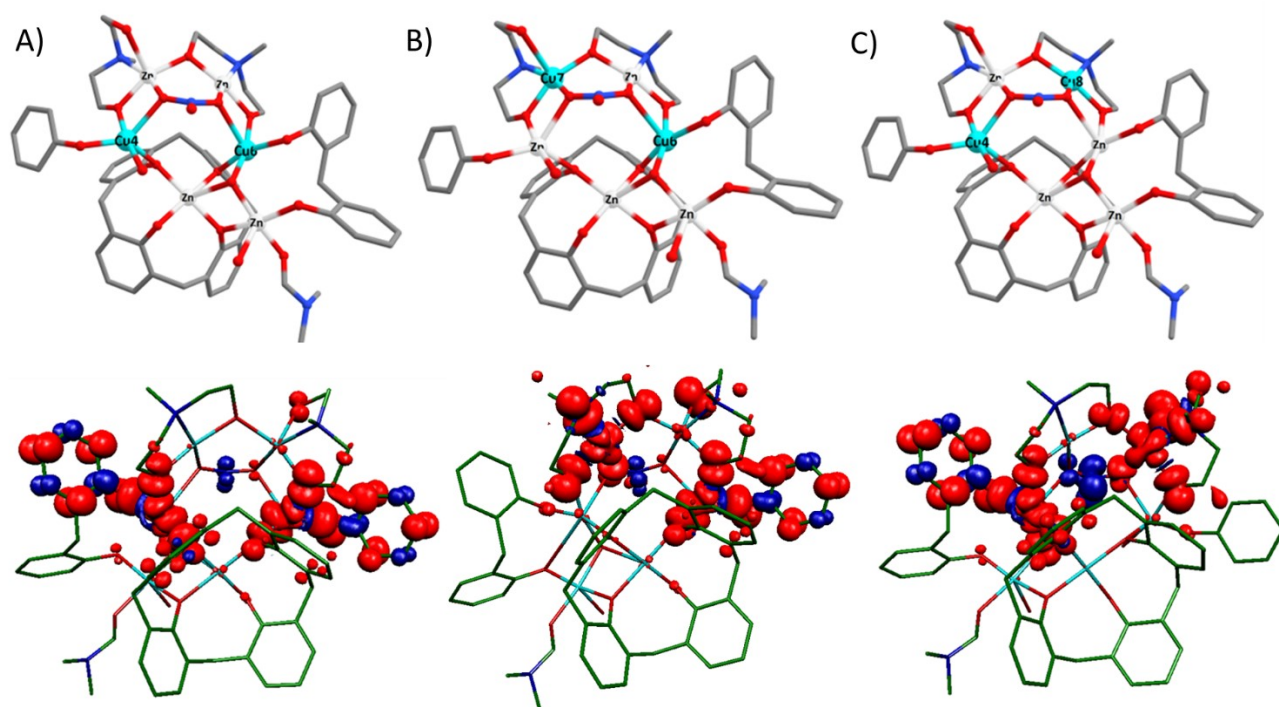

**Figure S14.** The three dimetallic model complexes (top) used to calculate the magnetic exchange interactions mediated solely through the nitrate anions between A) Cu4-Cu6, B) Cu7-Cu6 and C) Cu4-Cu8. The values are  $J = -0.6 \text{ cm}^{-1}$ ,  $+0.9 \text{ cm}^{-1}$  and  $+0.8 \text{ cm}^{-1}$ , respectively. The *syn, syn*-coordination mode ( $J_{\text{Cu4-Cu6}}$ ) results in a weak antiferromagnetic exchange interaction and the *syn, anti*-coordination mode ( $J_{\text{Cu6-Cu7}}$  and  $J_{\text{Cu4-Cu8}}$ ) results in a weak ferromagnetic exchange interaction. The associated spin density plots are shown in the bottom half of the figure, with an isodensity surface value  $0.001 \text{ e bohr}^{-3}$ . The small spin densities evident on the N, O-atoms of the nitrate are indicative of weak magnetic exchange.
